# Supplementary material for: Los festivales, IV Festival de Mallorca, La Canción del Duero: Música ligera
Source: Royal Society of Chemistry journal article supplement (doi:10.1039/c9ra02257k), 1967-01-01
Supplement: c9ra02257k1.pdf [file c9ra02257k1.pdf]

**Supporting Information.**

Table S1. Parameters of the microwave-assisted hydrothermal synthesis and unit cell parameters of the  $\text{Na}_3\text{V}_2\text{O}_{2x}(\text{PO}_4)_2\text{F}_{3-2x}$  solid solutions.

| #  | Reducing agent                                                                    | Precursor load, mol<br>$\text{V}_2\text{O}_5/\text{NH}_4\text{H}_2\text{PO}_4/\text{NaF}$ | Reducing agent load, mol | Time, min | Temperature, °C | $a$ , Å    | $c$ , Å    | $V$ , Å <sup>3</sup> |
|----|-----------------------------------------------------------------------------------|-------------------------------------------------------------------------------------------|--------------------------|-----------|-----------------|------------|------------|----------------------|
| 1  | $\text{C}_2\text{H}_2\text{O}_4$                                                  | 0.004/0.008/0.012                                                                         | 0.008                    | 15        | 180             | 6.3935(3)  | 10.6390(7) | 434.88(3)            |
| 2  | $\text{C}_2\text{H}_2\text{O}_4$                                                  | 0.004/0.008/0.012                                                                         | 0.008                    | 30        | 180             | 6.3932(2)  | 10.6345(6) | 434.67(2)            |
| 3  | $\text{C}_2\text{H}_2\text{O}_4$                                                  | 0.004/0.008/0.012                                                                         | 0.008                    | 30        | 200             | 6.3915(3)  | 10.6316(5) | 434.32(4)            |
| 4  | $\text{C}_2\text{H}_2\text{O}_4$                                                  | 0.005/0.010/0.015                                                                         | 0.010                    | 15        | 200             | 6.3915(2)  | 10.6289(5) | 434.21(4)            |
| 5  | $\text{C}_2\text{H}_2\text{O}_4$                                                  | 0.005/0.010/0.015                                                                         | 0.010                    | 6         | 220             | 6.3922(3)  | 10.6321(7) | 434.44(6)            |
| 6  | $\text{C}_2\text{H}_2\text{O}_4^*$                                                | 0.0125/0.025/0.0375                                                                       | 0.025                    | 15        | 200             | 6.3900(1)  | 10.6325(2) | 434.15(1)            |
| 7  | $\text{C}_6\text{H}_8\text{O}_7$                                                  | 0.005/0.010/0.015                                                                         | 0.010                    | 10        | 180             | 6.39585(7) | 10.6355(2) | 435.06(1)            |
| 8  | $\text{C}_6\text{H}_8\text{O}_7$                                                  | 0.005/0.010/0.015                                                                         | 0.010                    | 30        | 180             | 6.3935(5)  | 10.628(1)  | 434.42(6)            |
| 9  | $\text{NaBH}_4$                                                                   | 0.002/0.004/0.006                                                                         | 0.006                    | 15        | 180             | 6.39189(9) | 10.6331(2) | 434.43(1)            |
| 10 | $\text{N}_2\text{H}_4 \cdot \text{H}_2\text{SO}_4/\text{C}_2\text{H}_2\text{O}_4$ | 0.005/0.010/0.015                                                                         | 0.005/0.005              | 5         | 200             | 6.3891(13) | 10.6404(3) | 434.35(2)            |
| 11 | $\text{N}_2\text{H}_4 \cdot \text{HCl}/\text{C}_2\text{H}_2\text{O}_4$            | 0.005/0.010/0.015                                                                         | 0.005/0.005              | 5         | 200             | 6.3929(2)  | 10.7014(4) | 437.36(3)            |
| 12 | $\text{N}_2\text{H}_4 \cdot \text{HCl}/\text{C}_2\text{H}_2\text{O}_4$            | 0.005/0.010/0.015                                                                         | 0.005/0.005              | 15        | 200             | 6.3964(1)  | 10.6989(4) | 437.74(2)            |

\* - the initial reagents were dissolved in 20 ml of deionized water

Table S2. Crystallographic data and Rietveld refinement parameters of the  $\text{Na}_3\text{V}_2\text{O}_{2x}(\text{PO}_4)_2\text{F}_{3-2x}$  solid solutions.

| Formula                    | $\text{Na}_3\text{V}_2\text{O}_2(\text{PO}_4)_2\text{F}$<br>(CSD 1904096) | $\text{Na}_3\text{V}_2\text{O}_{0.8}(\text{PO}_4)_2\text{F}_{2.2}$<br>(CSD 1904025) |
|----------------------------|---------------------------------------------------------------------------|-------------------------------------------------------------------------------------|
| Space group                | <i>I4/mmm</i>                                                             |                                                                                     |
| <i>a</i> , Å               | 6.38643(4)                                                                | 6.39455(5)                                                                          |
| <i>c</i> , Å               | 10.62375(8)                                                               | 10.6988(2)                                                                          |
| <i>V</i> , Å <sup>3</sup>  | 433.306(5)                                                                | 437.475(11)                                                                         |
| <i>Z</i>                   | 2                                                                         | 2                                                                                   |
| $\rho$ , g/cm <sup>3</sup> | 3.16                                                                      | 3.15                                                                                |
| Radiation                  | CoK <sub><math>\alpha</math>1</sub> , $\lambda = 1.78892$ Å               | CuK <sub><math>\alpha</math>1</sub> , $\lambda = 1.54056$ Å                         |
| 2 $\theta$ , range, deg.   | 9.9 – 120                                                                 | 4 - 100                                                                             |
| Number of reflections      | 71                                                                        | 87                                                                                  |
| Parameters refined         | 13                                                                        | 13                                                                                  |
| $R_F$ , $R_P$ , $R_{WP}$   | 0.036, 0.012, 0.016                                                       | 0.032, 0.019, 0.024                                                                 |

Table S3. Atomic coordinates, occupancy factors and atomic displacement parameters for Na<sub>3</sub>V<sub>2</sub>O<sub>2</sub>(PO<sub>4</sub>)<sub>2</sub>F (first rows) and Na<sub>3</sub>V<sub>2</sub>O<sub>0.8</sub>(PO<sub>4</sub>)<sub>2</sub>F<sub>2.2</sub> (second rows).

| Atom | Position    | Occupancy  | <i>x/a</i> | <i>y/b</i>  | <i>z/c</i>  | U <sub>iso</sub> , Å <sup>2</sup> |
|------|-------------|------------|------------|-------------|-------------|-----------------------------------|
| Na1  | 8 <i>h</i>  | 0.690(2)   | 0.2689(2)  | <i>x</i>    | 0           | 0.0491(11)                        |
|      |             | 0.546(4)   | 0.2735(3)  |             |             | 0.0172(12)                        |
| Na2  | 16 <i>l</i> | 0.060(2)   | 0.195(5)   | 1/2         | 0           | 0.0491(11)                        |
|      |             | 0.102(2)   | 0.2105(15) | 0.4043(15)  |             | 0.0172(12)                        |
| V1   | 4 <i>e</i>  | 1          | 0          | 0           | 0.19950(10) | 0.0243(5)                         |
|      |             |            |            |             | 0.19232(9)  | 0.0104(4)                         |
| P1   | 4 <i>c</i>  | 1          | 0          | 1/2         | 1/4         | 0.0217(6)                         |
|      |             |            |            |             |             | 0.0043(5)                         |
| O1   | 16 <i>n</i> | 1          | 0          | 0.3082(2)   | 0.16305(12) | 0.0164(4)                         |
|      |             |            |            | 0.30814(18) | 0.16544(13) | 0.0060(4)                         |
| O2   | 4 <i>e</i>  | 1          | 0          | 0           | 0.3515(3)   | 0.0164(4)                         |
|      |             | 0.4O/0.6F* |            |             | 0.3556(3)   | 0.0060(4)                         |
| F1   | 2 <i>a</i>  | 1          | 0          | 0           | 0           | 0.0164(4)                         |
|      |             |            |            |             |             | 0.0060(4)                         |

\*- the occupancy factor was not refined.

Table S4. Main interatomic distances for Na<sub>3</sub>V<sub>2</sub>O<sub>2</sub>(PO<sub>4</sub>)<sub>2</sub>F and Na<sub>3</sub>V<sub>2</sub>O<sub>0.8</sub>(PO<sub>4</sub>)<sub>2</sub>F<sub>2.2</sub>.

| Na <sub>3</sub> V <sub>2</sub> O <sub>2</sub> (PO <sub>4</sub> ) <sub>2</sub> F |              |                 |             | Na <sub>3</sub> V <sub>2</sub> O <sub>0.8</sub> (PO <sub>4</sub> ) <sub>2</sub> F <sub>2.2</sub> |             |                |            |
|---------------------------------------------------------------------------------|--------------|-----------------|-------------|--------------------------------------------------------------------------------------------------|-------------|----------------|------------|
| Na1-O1                                                                          | 2.4520(14)   | V1-O1           | 2.0063 (13) | Na1-O1                                                                                           | 2.4983(18)  | V1-O1          | 1.9909(12) |
| ×4                                                                              |              | ×4              |             | ×4                                                                                               |             | ×4             |            |
| Na1-O2                                                                          | 2.616(2) ×2  | V1-O2           | 1.615(4)    | Na1-O2                                                                                           | 2.565(2) ×2 | V1-O2          | 1.748(3)   |
| Na1-F1                                                                          | 2.4284(16)   | V1-F1           | 2.1194(10)  | Na1-F1                                                                                           | 2.473(2)    | V1-F1          | 2.0579(10) |
|                                                                                 |              | BVS = 4.052(16) |             |                                                                                                  |             | BVS = 3.395(7) |            |
| Na2-O1                                                                          | 2.461(15) ×4 |                 |             | Na2-O1                                                                                           | 2.311(6) ×2 |                |            |
| Na2-O2                                                                          | 2.51(1) ×2   | P1-O1           | 1.5340(13)  | Na2-O1                                                                                           | 2.886(8) ×2 | P1-O1          | 1.5242(12) |
| Na2-F1                                                                          | 2.76(2)      | ×4              |             | Na2-O2                                                                                           | 2.483(8) ×2 | ×4             |            |
|                                                                                 |              |                 |             | Na2-F1                                                                                           | 2.919(10)   |                |            |

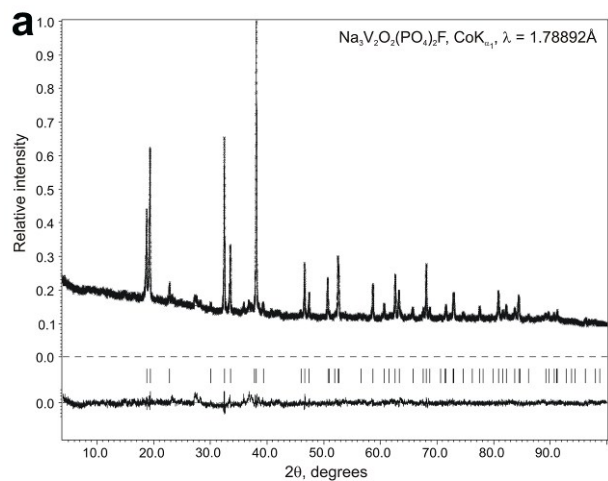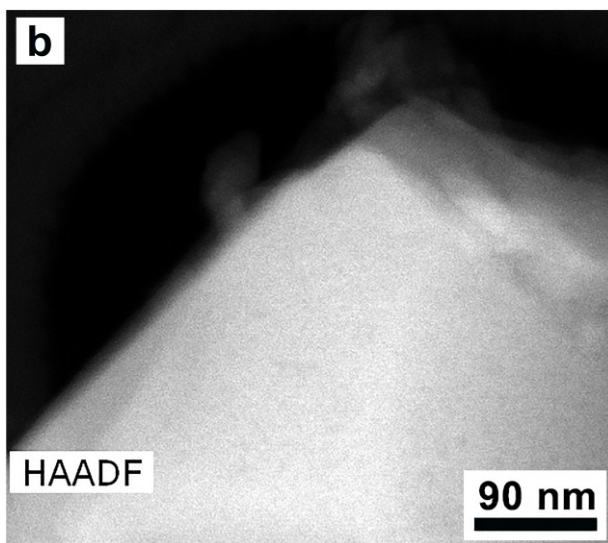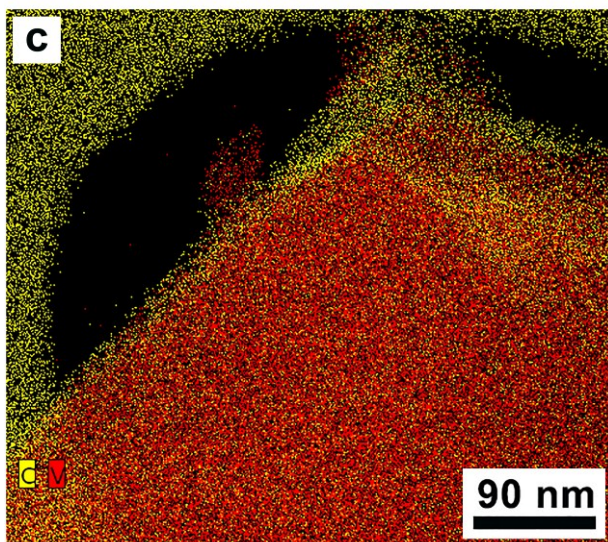

Fig. S1. The experimental, calculated and difference PXRD profiles for  $\text{Na}_3\text{V}_2\text{O}_2(\text{PO}_4)_2\text{F}$  carbon-coated with dopamine and annealed at  $600\text{ }^\circ\text{C}$  for 3 h after Rietveld refinement (a); EDX mapping (carbon and vanadium) for  $\text{Na}_3\text{V}_2\text{O}_2(\text{PO}_4)_2\text{F}$  carbon-coated by dopamine and annealed at  $600\text{ }^\circ\text{C}$  for 3 h (b, c).

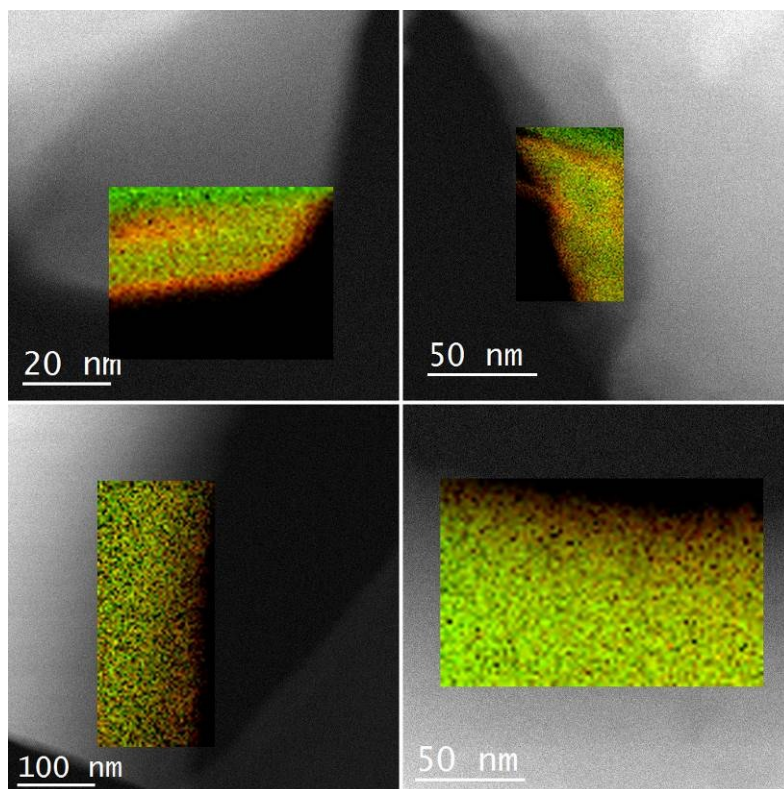

Fig. S2. STEM-EELS mapping of  $V^{3+}$  (red) and  $V^{4+}$  (green) at the surface of the crystallites in  $Na_3V_2O_2(PO_4)_2F$  synthesized with oxalic acid. The  $V^{3+}$  and  $V^{4+}$  signals were integrated within 1 eV windows centered at 517.8 eV and 519.2 eV, respectively.

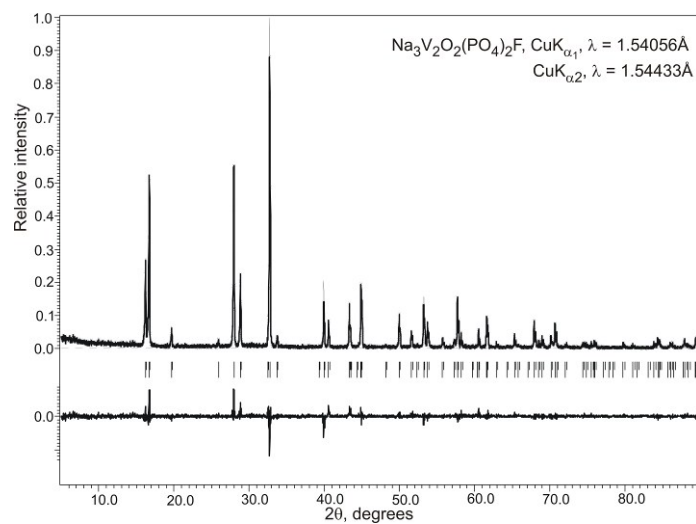

Fig. S3. The experimental, calculated and difference PXRD profiles for the 3 g batch of  $Na_3V_2O_2(PO_4)_2F$  after Rietveld refinement.

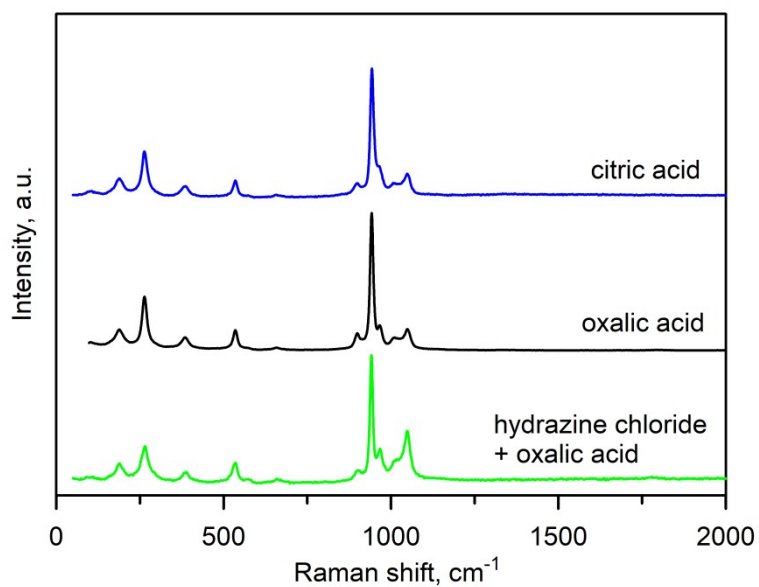

Fig. S4. Raman spectra of  $\text{Na}_3\text{V}_2\text{O}_2(\text{PO}_4)_2\text{F}$  prepared with citric acid (blue) and oxalic acid (black) and the spectrum of  $\text{Na}_3\text{V}_2\text{O}_{0.8}(\text{PO}_4)_2\text{F}_{2.2}$  synthesized with the mixture of hydrazine chloride with oxalic acid (green).

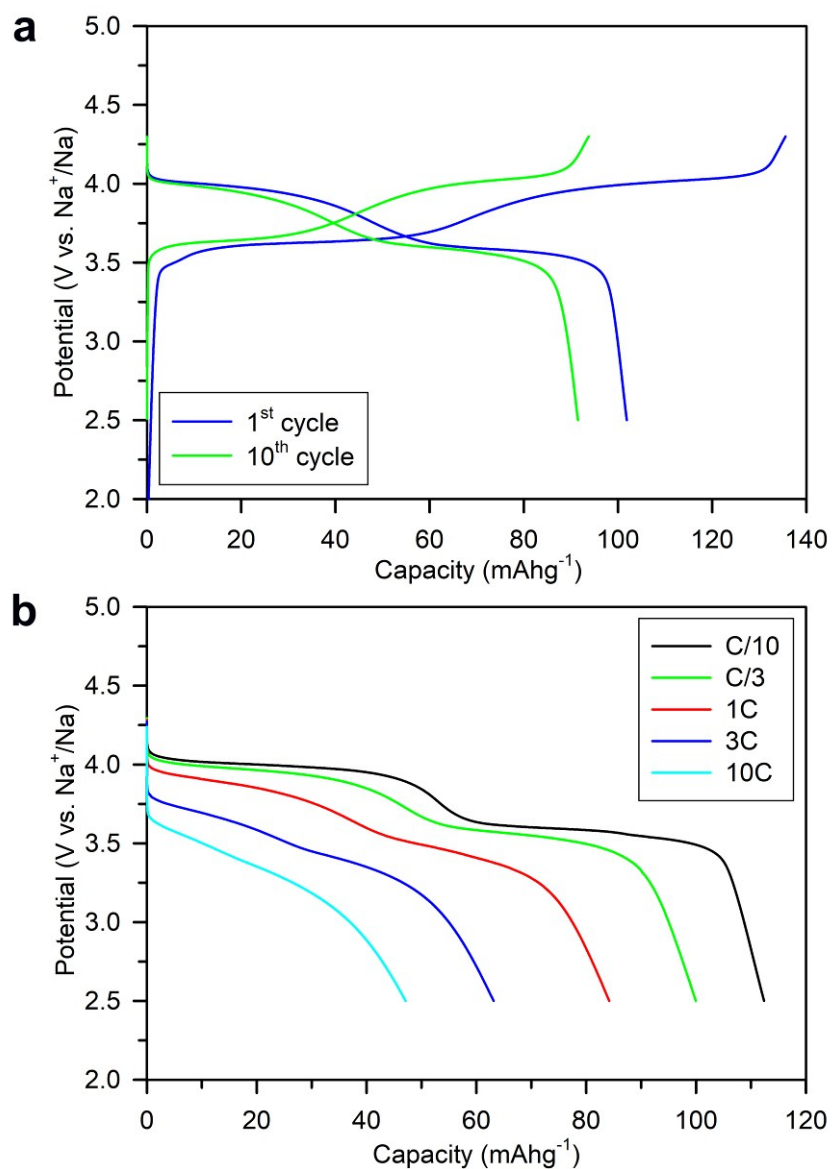

Fig. S5. Electrochemical performance of  $\text{Na}_3\text{V}_2\text{O}_2(\text{PO}_4)_2\text{F}$  obtained with citric acid as a reducing agent, in the potential range 2.5÷4.3 V rel.  $\text{Na}^+/\text{Na}$ , at room temperature: galvanostatic charge-discharge profiles of 1<sup>st</sup> and 10<sup>th</sup> cycles after cycling at C/10 current density (a); galvanostatic charge-discharge profiles at different current densities (b).

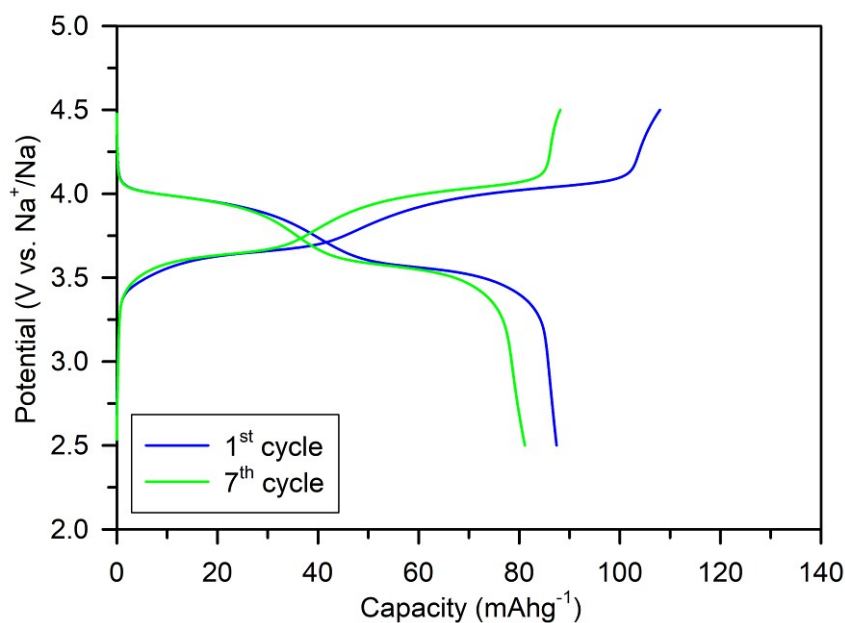

Fig. S6. Electrochemical performance of  $\text{Na}_3\text{V}_2\text{O}_2(\text{PO}_4)_2\text{F}$  obtained with  $\text{NaBH}_4$  as a reducing agent, in the potential range 2.5÷4.5 V rel.  $\text{Na}^+/\text{Na}$ , at room temperature: galvanostatic charge-discharge profiles of 1<sup>st</sup> and 7<sup>th</sup> cycles after cycling at C/10 current density

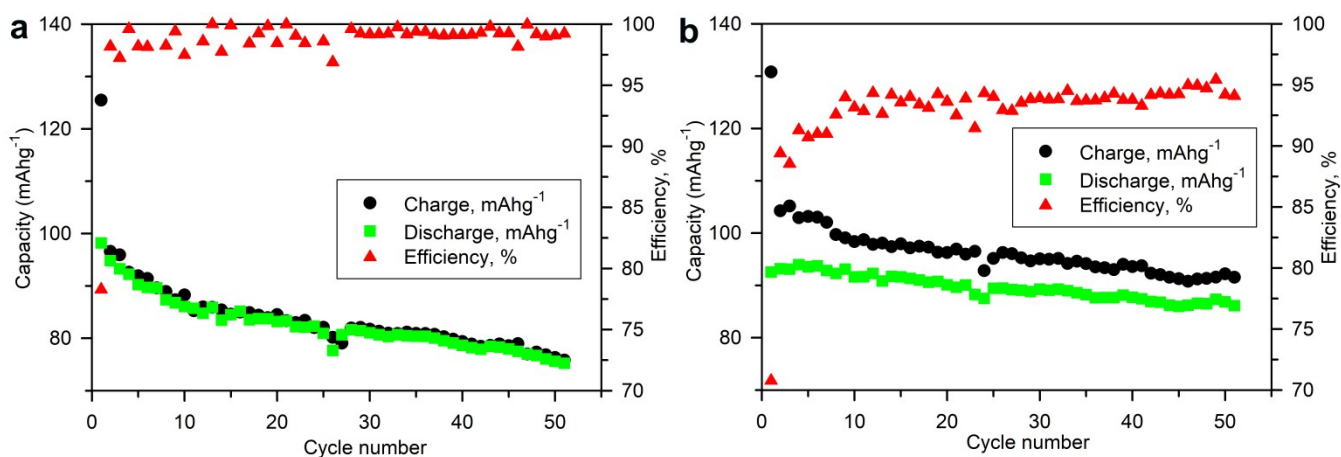

Fig. S7. Coulombic efficiency of  $\text{Na}_3\text{V}_2\text{O}_2(\text{PO}_4)_2\text{F}$  annealed with glucose (8 mass. %) at  $600^\circ\text{C}$  during 1 h (a), coated with dopamine for 24 h and annealed at  $500^\circ\text{C}$  during 3 h (b) in the potential range 2.5÷4.3 V vs.  $\text{Na}^+/\text{Na}$  at room temperature cycled at C/2 current densities.



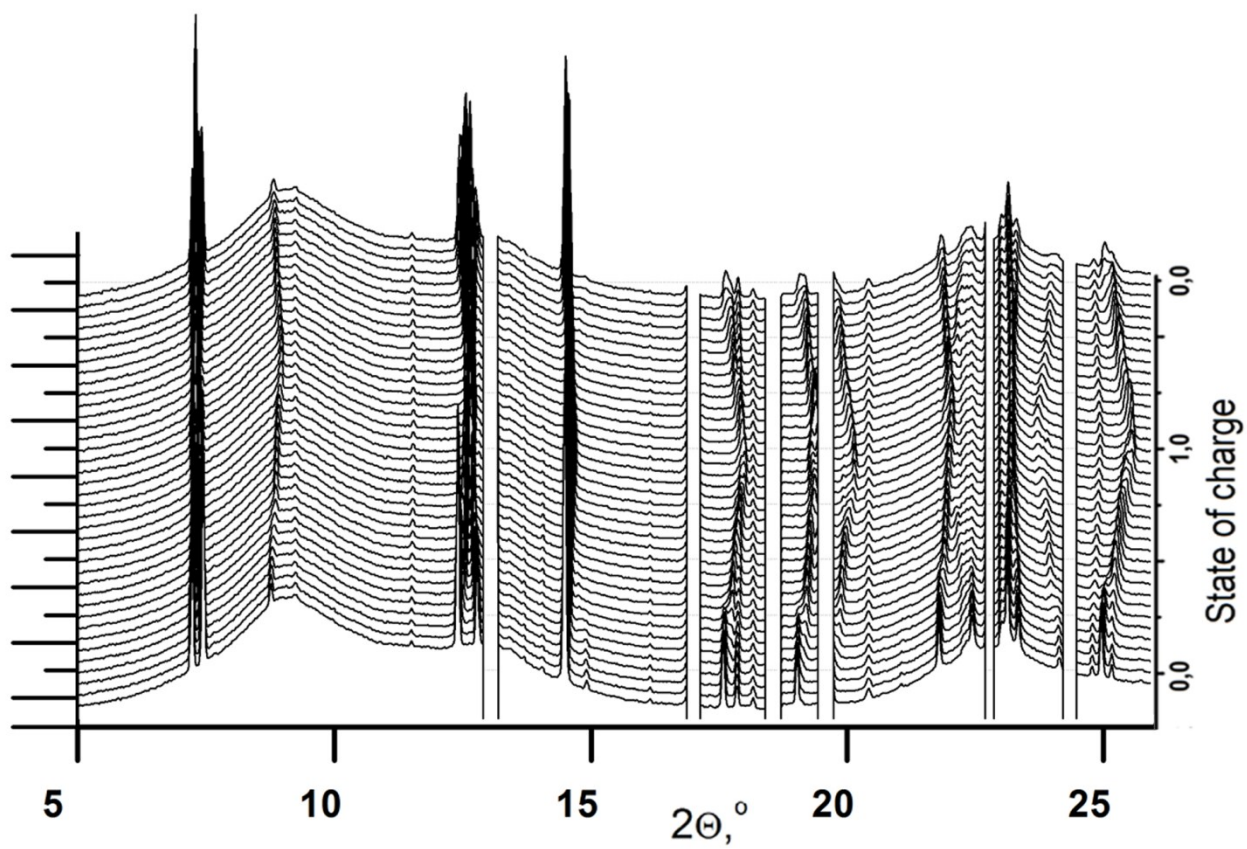

Fig. S8. Extended (5-26°  $2\theta$ ) range of SXPD patterns collected in *operando* regime. Deleted regions contain Al and Na reflections
